# Supplementary material for: Utero-Placental Immune Milieu during Normal and Aglepristone-Induced Parturition in the Dog
Source: MDPI journal article supplement (doi:10.3390/ani11123598), 2021-12-19
Supplement: s1 [file s1]

**Table S1. List of gene symbols, corresponding gene names and TaqMan systems used for semi-quantitative real time qPCR**

| Gene              | Name                                                        | Accession number                                                                         | Primer sequence |                                               | Product length (bp) |
|-------------------|-------------------------------------------------------------|------------------------------------------------------------------------------------------|-----------------|-----------------------------------------------|---------------------|
| MHC II            | Major histocompatibility complex II                         | NM_001011723.1                                                                           | Forward         | 5'-GGA GAG CCC AAC ATC CTC ATC-3'             | 90                  |
|                   |                                                             |                                                                                          | Reverse         | 5'-GGT GAC AGG GTT TCC ATT TCG-3'             |                     |
|                   |                                                             |                                                                                          | TaqMan probe    | 5'-TCG ACA AGT TCT CCC CAC C-3'               |                     |
| CD206/MCR1        | Cluster of differentiation 206/mannose receptor C-Type 1    | XM_005617091.3                                                                           | Forward         | 5'-GGC AGG AAG ATT GTG TCG TCA T-3'           | 108                 |
|                   |                                                             |                                                                                          | Reverse         | 5'-TGG GCT GGG TTT GAG ATT TC-3'              |                     |
|                   |                                                             |                                                                                          | TaqMan probe    | 5'-TGG GCA GAT CGA GCC TGC GAG-3'             |                     |
| NCR1              | Natural cytotoxicity triggering receptor 1                  | NM_001284448.1                                                                           | Forward         | 5'-CTG GGA TCA CAC TGC CCA TAA T-3'           | 103                 |
|                   |                                                             |                                                                                          | Reverse         | 5'-CCT CTT CCT GCA AAG CCA GTA-3'             |                     |
|                   |                                                             |                                                                                          | TaqMan probe    | 5'-CTT TCC TGG TCC TGA TGG CCC TCA-3'         |                     |
| IL1β              | Interleukin 1 beta                                          | NM_001037971.1                                                                           | Forward         | 5'-TGC CAA GAC CTG AAC CAC AGT-3'             | 97                  |
|                   |                                                             |                                                                                          | Reverse         | 5'-CTG ACA CGA AAT GCC TCA GAC T-3'           |                     |
|                   |                                                             |                                                                                          | TaqMan probe    | 5'-CAT CCA GTT GCA AGT CTC CCA CCA GC-3'      |                     |
| IL6               | Interleukin 6                                               | AF275796.1                                                                               | Forward         | 5'-AAA GAG CAA GGT AAA GAA TCA GGA TG-3'      | 124                 |
|                   |                                                             |                                                                                          | Reverse         | 5'-GCA GGA TGA GGT GAA TTG TG-3'              |                     |
|                   |                                                             |                                                                                          | TaqMan probe    | 5'-ACT CCT GAC CCA ACC ACA GAC GCC A-3'       |                     |
| IL8/CXCL8         | Interleukin 8/ C-X-C motif chemokine ligand 8               | NM_001003200.1                                                                           | Forward         | 5'-CCA CAC CTT TCC ATC CCA AA-3'              | 114                 |
|                   |                                                             |                                                                                          | Reverse         | 5'-CCA GGC ACA CCT CAT TTC CA-3'              |                     |
|                   |                                                             |                                                                                          | TaqMan probe    | 5'-CTG AGA GTG ATT GAC AGT GGC CCA CAT TGT-3' |                     |
| TNFα              | Tumor necrosis factor alpha                                 | NM_001003244                                                                             | Forward         | 5'-TGC CCT TCC ACC CAT GTG-3'                 | 96                  |
|                   |                                                             |                                                                                          | Reverse         | 5'-AGG GCT CTT GAT GGC AGA GA-3'              |                     |
|                   |                                                             |                                                                                          | TaqMan probe    | 5'-CCC ACA CCA TCA GCC GCT TCG-3'             |                     |
| TNFR1             | Tumor necrosis factor receptor 1                            | XM_849381                                                                                | Forward         | 5'-TGT GTG GCT GCA GGA AGA AC-3'              | 114                 |
|                   |                                                             |                                                                                          | Reverse         | 5'-GCT TCT CTT GGC AGG AGA TCT-3'             |                     |
|                   |                                                             |                                                                                          | TaqMan probe    | 5'-ACT CCA CCC TCT GCC TCA ATG GCA-3'         |                     |
| TNFR2             | Tumor necrosis factor receptor 2                            | XM_005617982                                                                             | Forward         | 5'-CCA GCA GAG CGA GTA CTT CGA-3'             | 95                  |
|                   |                                                             |                                                                                          | Reverse         | 5'-TCG AGG TCT TGG TGC AGA AGA-3'             |                     |
|                   |                                                             |                                                                                          | TaqMan probe    | 5'-CAT GTG TCC CCC TGG CTC CCA C-3'           |                     |
| IDO-1             | Indolamin 2,3-dioxygenase 1                                 | XM_532793.5                                                                              | Forward         | 5'-TGA TGG CCT TAG TGG ACA CAA G-3'           | 116                 |
|                   |                                                             |                                                                                          | Reverse         | 5'-TCT GTG GCA AGA CTT TTC GA-3'              |                     |
|                   |                                                             |                                                                                          | TaqMan probe    | 5'-CAG CGC CTT GCA CGT CTG GC-3'              |                     |
| AIF1              | Allograft inflammatory factor 1                             | XM_532072.5                                                                              | Forward         | 5'-CGA ATG CTG GAG AAA CTT GGT-3'             | 107                 |
|                   |                                                             |                                                                                          | Reverse         | 5'-TGA GAA AGT CAG AGT AGC TGAAGG T-3'        |                     |
|                   |                                                             |                                                                                          | TaqMan probe    | 5'-TCC CCA AGA CCC ATC TGG AGC TCA A-3'       |                     |
| GAPDH             | Glyceraldehyde-3-phosphate dehydrogenase                    | AB028142.1                                                                               | Forward         | 5'-GCT GCC AAA TAT GAC GAC ATC A-3'           | 75                  |
|                   |                                                             |                                                                                          | Reverse         | 5'-GTA GCC CAG GAT GCC TTT GAG-3'             |                     |
|                   |                                                             |                                                                                          | TaqMan probe    | 5'-TCC CTC CGA TGC CTG CTT CAC TAC CTT-3'     |                     |
|                   |                                                             |                                                                                          | TaqMan probe    | 5'-CAT GTG TCC CCC TGG CTC CCA C-3'           |                     |
| CD163             | Cluster of differentiation 163                              | Pre-designed assay from Applied Biosystems (Foster City, CA, USA) Prod.No. Cf02627321_m1 |                 |                                               |                     |
| CD4               | Cluster of differentiation 4                                | Pre-designed assay from Applied Biosystems, Prod.No. Cf02627842_m1                       |                 |                                               |                     |
| CD8               | Cluster of differentiation 8                                | Pre-designed assay from Applied Biosystems, Prod.No. Cf02627888_m1                       |                 |                                               |                     |
| CD25/IL2Ra        | Cluster of differentiation 25/ interleukin 2 receptor alpha | Pre-designed assay from Applied Biosystems, Prod.No. Cf02623133_m1                       |                 |                                               |                     |
| FoxP3             | Forkhead Box P3                                             | Pre-designed assay from Applied Biosystems, Prod.No. Cf02741703_m1                       |                 |                                               |                     |
| IL10              | Interleukin 10                                              | Pre-designed assay from Applied Biosystems, Prod.No. Cf02624264_m1                       |                 |                                               |                     |
| IL12α             | Interleukin 12                                              | Pre-designed assay from Applied Biosystems, Prod.No. Cf02628398_m1                       |                 |                                               |                     |
| TGFβ              | Transforming growth factor 1 beta                           | Pre-designed assay from Applied Biosystems, Prod.No. Cf02623324_m1                       |                 |                                               |                     |
| CCL3              | C-C motif chemokine ligand 3                                | Pre-designed assay from Applied Biosystems, Prod.No. Cf02671956_m1                       |                 |                                               |                     |
| CCL13             | C-C motif chemokine ligand 13                               | Pre-designed assay from Applied Biosystems, Prod.No. Cf02622470_mH                       |                 |                                               |                     |
| CCR7              | C-C motif chemokine receptor 7                              | Pre-designed assay from Applied Biosystems, Prod.No. Cf02654980_m1                       |                 |                                               |                     |
| TLR4              | Toll-like receptor 4                                        | Pre-designed assay from Applied Biosystems, Prod.No. Cf02622203_g1                       |                 |                                               |                     |
| IGF1              | Insulin-like growth factor 1                                | Pre-designed assay from Applied Biosystems, Prod.No. Cf02627846_m1                       |                 |                                               |                     |
| IGF2              | Insulin-like growth factor 2                                | Pre-designed assay from Applied Biosystems, Prod.No. Cf02647136_m1                       |                 |                                               |                     |
| ENG               | Endoglin                                                    | Pre-designed assay from Applied Biosystems, Prod.No. Cf02658400_m1                       |                 |                                               |                     |
| CDH1              | Cadherin-1/epithelial cadherin (E-cadherin)                 | Pre-designed assay from Applied Biosystems, Prod.No. Cf02624268_m1                       |                 |                                               |                     |
| ECM2              | Extracellular matrix protein 2                              | Pre-designed assay from Applied Biosystems, Prod.No. Cf02641132_m1                       |                 |                                               |                     |
| MMP2              | Matrix metalloproteinase 2                                  | Pre-designed assay from Applied Biosystems, Prod.No. Cf02741675_m1                       |                 |                                               |                     |
| β-actin           | Beta-actin                                                  | Pre-designed assay from Applied Biosystems, Prod.No. Cf03023880_g1                       |                 |                                               |                     |
| PPIA/ Cyclophilin | Peptidylprolyl isomerase A                                  | Pre-designed assay from Applied Biosystems, Prod.No. Cf03986523_gH                       |                 |                                               |                     |
