# Supplementary material for: Utero-Placental Immune Milieu during Normal and Aglepristone-Induced Parturition in the Dog
Source: MDPI journal article supplement (doi:10.3390/ani11123598), 2021-12-19
Supplement: s1 [file s1]

**Table S2. List of antibodies used in immunohistochemical staining**

| Target Protein                | Product number                                                 | Antibody dilution |
|-------------------------------|----------------------------------------------------------------|-------------------|
| <b>MHCII</b>                  | ORB101661 (Biorbyt, Cambridge, UK)                             | 1:200             |
| <b>CD86</b>                   | ORB49101 (Biorbyt, Cambridge, UK)                              | 1:400             |
| <b>Nkp46</b>                  | ORB157934 (Biorbyt, Cambridge, UK)                             | 1:400             |
| <b>CD4</b>                    | AB125711 (Abcam, Cambridge, UK)                                | 1:400             |
| <b>TNF<math>\alpha</math></b> | AB6671 (Abcam, Cambridge, UK)                                  | 1:200             |
| <b>TNFR1</b>                  | AB19139 (Abcam, Cambridge, UK)                                 | 1:200             |
| <b>TNFR2</b>                  | AB15563 (Abcam, Cambridge, UK)                                 | 1:200             |
| <b>IDO1</b>                   | LS-C174759 (LSBio, Seattle, WA, USA)                           | 1:50              |
| <b>AIF1</b>                   | LS-B2403 (LSBio, Seattle, WA, USA)                             | 1:400             |
| <b>CD206</b>                  | SC-376108 (Santa Cruz Biotechnology Inc., Santa Cruz, CA, USA) | 1:400             |
| <b>CD163</b>                  | DB045 (DB Biotech, Kosice, SK)                                 | 1:400             |
